# Supplementary material for: SECM imaging of MMD-enhanced latent fingermarks
Source: Royal Society of Chemistry journal article supplement (doi:10.1039/b710947d), 2007-01-01
Supplement: b710947d.pdf [file b710947d.pdf]

## SECM imaging of MMD-enhanced latent fingerprints

Meiqin Zhang,<sup>a</sup> Andy Becue,<sup>b</sup> Michel Prudent,<sup>a</sup> Christophe Champod\*<sup>b</sup> and Hubert H. Girault\*<sup>a</sup>

<sup>a</sup> Laboratoire d'Electrochimie Physique et Analytique, Ecole Polytechnique Fédérale de Lausanne, CH-1015 Lausanne, Switzerland

<sup>b</sup> Institut de Police Scientifique, School of Criminal Sciences, University of Lausanne, Batochime, CH-1015 Lausanne, Switzerland.

E-mails: hubert.girault@epfl.ch or christophe.champod@unil.ch

### Supporting Figure

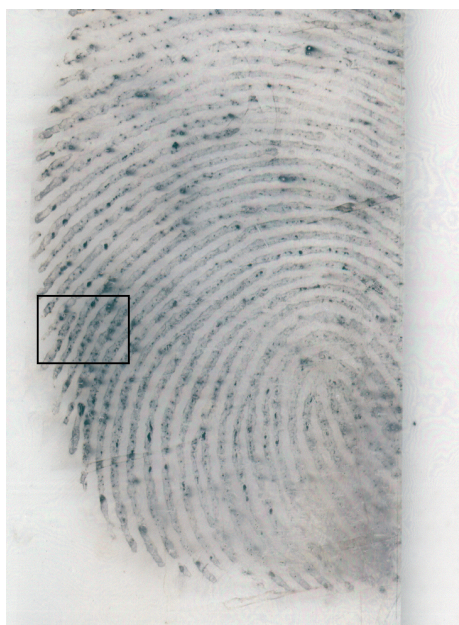

**Fig. S1.** An optical laser-scanner image of a MMD-enhanced latent fingerprint on the glass substrate. The SECM image area corresponds approximately to the rectangle region marked (inside black line), that is, the area in Fig. 2a.
